# Supplementary material for: Circumventing Drug Treatment? Intrinsic Lethal Effects of Polyethyleneimine (PEI)-Functionalized Nanoparticles on Glioblastoma Cells Cultured in Stem Cell Conditions
Source: MDPI journal article supplement (doi:10.3390/cancers13112631), 2021-05-27

Figure 4.

- Samples run in duplicates
- All data are same from the same membrane.
- Between each picture the membrane has been stripped and reprobed.

### BT12

Control 24h 48h

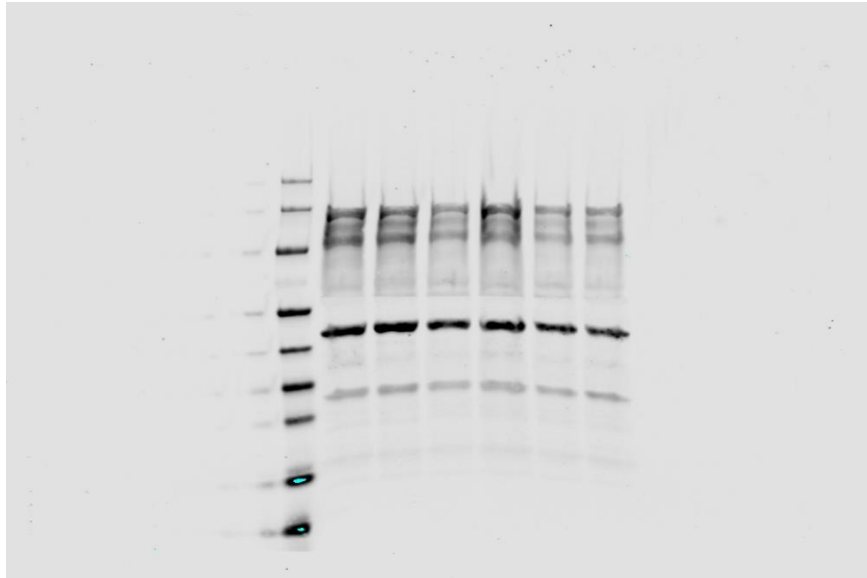

Full PARP-1 (116 kDa)

cPARP-1 (89kDa)

B-actin (42 kDa)

cPARP-1 (25kDa)

### BT12

Control 24h 48h

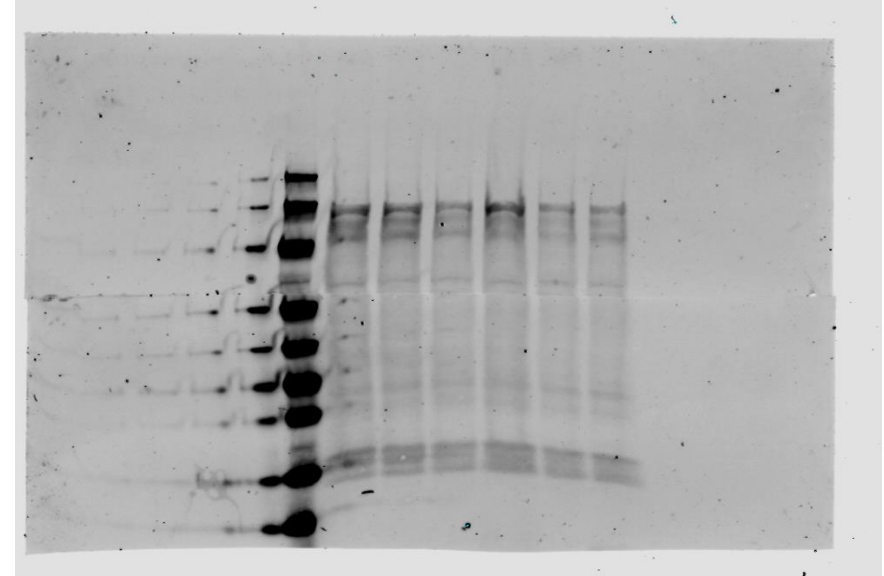

LC3B (15 kDa)

### BT12

Control 24h 48h

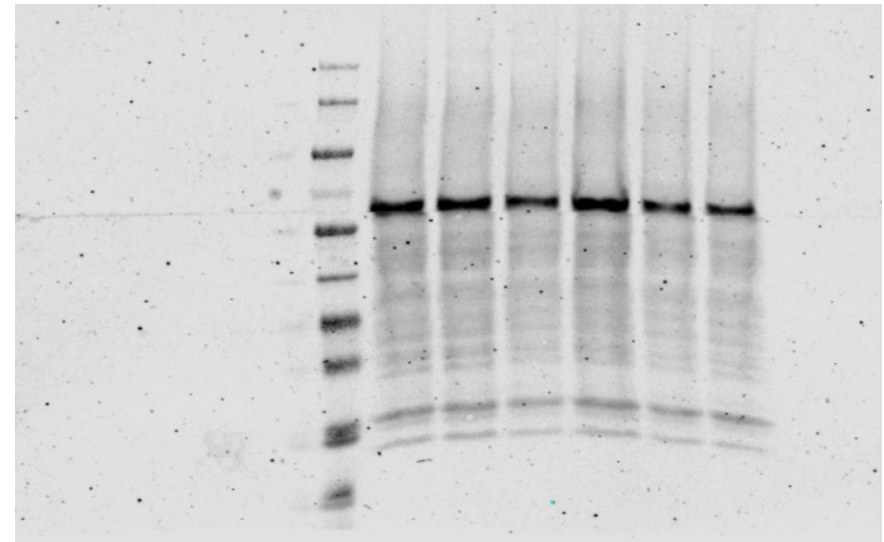

P62 (65 kDa)

Supplementary figure 2.

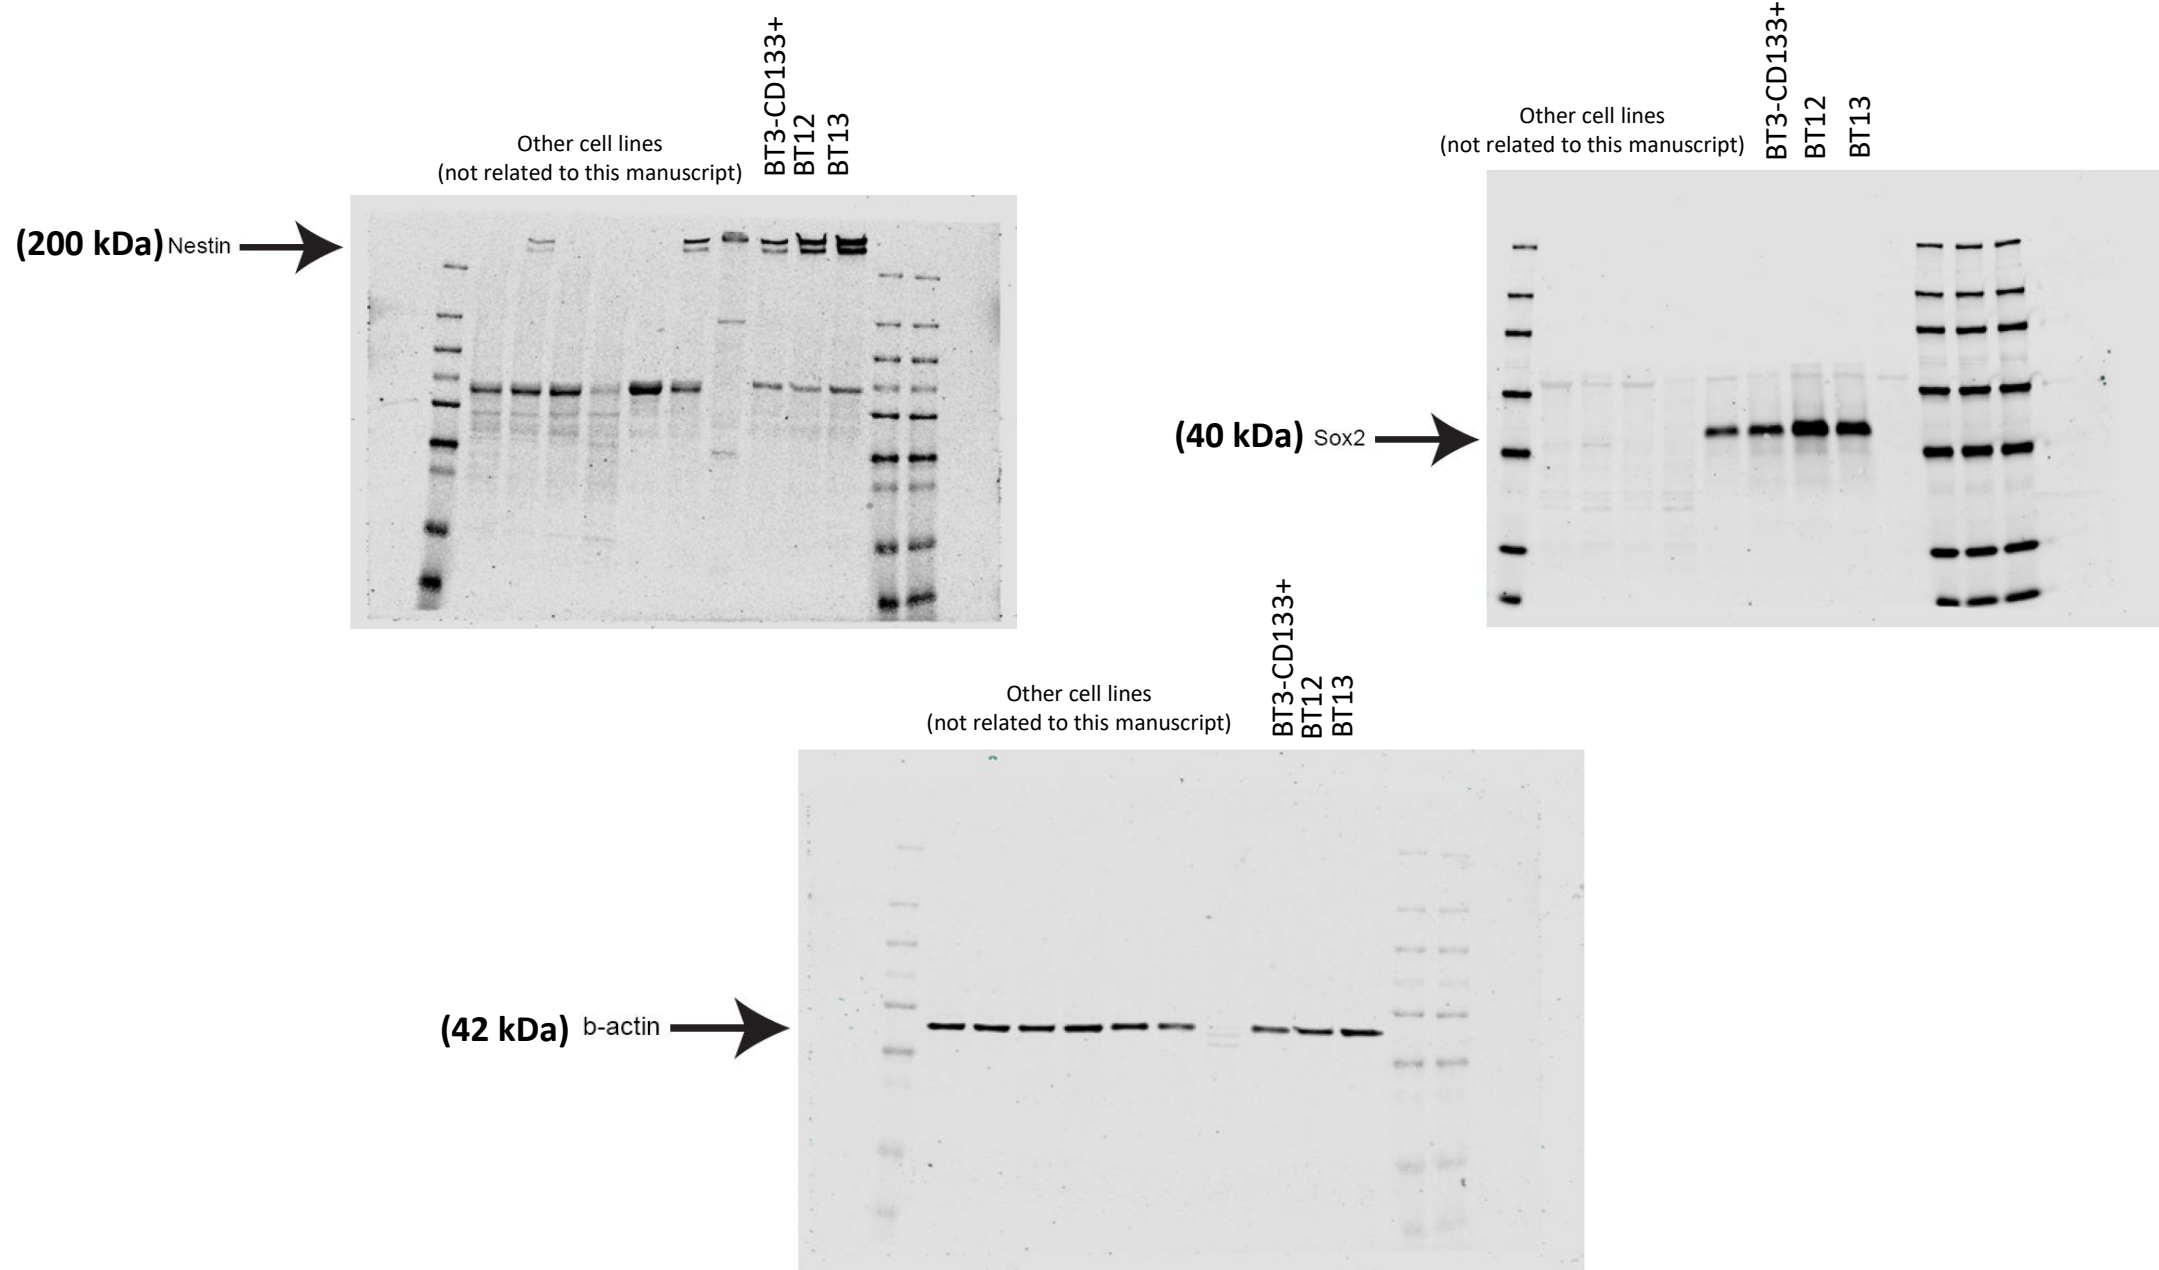

Supplement: s1 [file s1]
